# Supplementary material for: Grief Counselling: A Soothing Balm for Bereaved Mothers
Source: Research Square preprint supplement (doi:10.21203/rs.3.rs-6890320/v1), 2025-08-06
Supplement: Supplementary file 1 [file d147795e5d7a3642e499e87b.docx]

# In-Depth Interview Guide

Grief Counselling for Bereaved Mothers after Child Death and MITS Participation
Chris Hani Baragwanath Academic Hospital, Soweto, South Africa (CHAMPS Programme)

Thank you for agreeing to participate in this interview. We would like to understand your personal experience of grief after the loss of your child and your thoughts on the grief counselling you received. This interview is confidential, voluntary, and you are free to stop or skip any questions at any time. With your permission, we would like to audio-record this conversation to make sure we capture your words accurately.

Confirm:
- Informed consent form signed [. ]
- Permission to record granted [. ]

## Section B: Demographic Information

1. Age:

2. Marital Status:

3. Employment status:

4. Number of children:

5. Age of the child who passed away:

6. Time since child’s death (months):

7. Location of counselling (hospital/home):

8. Number of grief counselling sessions attended:

## Section C: Experience of Child Loss

1. Can you tell me about your child and what happened leading up to their death?

**Probes:**

- How did you experience those days?

- What were your initial emotional reactions?

2. How did the loss affect you emotionally, physically, socially, or spiritually?

**Probes:**

- What has been the hardest part of this experience?

- What kind of support, if any, did you receive from family or the community?

## Section D: Experience with Grief Counselling

3. Can you describe how you first heard about the grief counselling sessions?

**Probes:**

- Who approached you?

- What were your thoughts or concerns at the time?

4. What was your experience like during the first grief counselling session?

**Probes:**

- Where was it held?

- How did you feel before, during, and after the session?

5. How would you describe your relationship with the grief counsellor?

- Did you feel comfortable and understood?

- Did you feel safe to express yourself?

6. How did the sessions change over time (e.g., emotionally, in terms of content)?

**Probes:**

- Were there specific topics or moments that stood out to you?

- Did you ask for more sessions or receive a referral?

## Section E: Impact and Value of Counselling

7. In what ways did the counselling sessions help you cope with your grief?

**Probes:**

- Emotional containment

- Coping strategies

- Reflection on loss

8. Were there things about the counselling that were not helpful or could be improved?

**Probe:**

- Language, setting, timing, frequency, cultural fit

9. Did you feel any changes in yourself (emotionally, socially, spiritually) after receiving counselling?

**Probe:**

- Do you feel the counselling helped your healing process?

10. Did the sessions help you talk with your family or others about your loss?

## Section F: Cultural and Contextual Considerations

11. How does your community or family usually handle grief or the loss of a child?

**Probe:**

- Did the counselling align or conflict with these practices?

12. Were there any cultural, religious, or social beliefs that made it easier or more difficult to participate in counselling?

## Section G: MITS-Specific Reflections

13. How did you feel about being asked to give consent for the MITS procedure?

**Probe:**

- What were your concerns or motivations?

- Did the counselling help in making this decision?

14. Did the counselling help you understand the MITS procedure or deal with any emotions around it?

## Section H: Recommendations and Reflections

15. If you were to advise another mother going through a similar loss, what would you tell her about grief counselling?

16. What recommendations would you give to the hospital or counselling service to better support grieving mothers like yourself?

## Section I: Closing

Thank you very much for sharing your story. Your input is deeply valuable and will help improve support services for other mothers facing the loss of a child. Is there anything else you would like to add about your experience?
